# Supplementary material for: Special NaBH4hydrolysis achieving multiple-surface-modifications promotes the high-throughput water oxidation of CoN nanowire arrays
Source: Royal Society of Chemistry journal article supplement (doi:10.1039/d3dt01339a), 2023-01-01
Supplement: d3dt01339a1.pdf [file d3dt01339a1.pdf]

## Supporting Information

### **Special NaBH<sub>4</sub> hydrolysis achieving multiple-surface-modifications promotes high-throughput water oxidation of CoN nanowire arrays**

Sirui Liu†<sup>a</sup>, Yuxin Shi†<sup>a</sup>, Lingling Xu,<sup>\*a</sup> Weican Zhan,<sup>a</sup> Meixi Chen,<sup>a</sup> Xiaoyue Pan,<sup>a</sup> Yuqing Yao,<sup>a</sup> Jiajie Cai,<sup>a</sup> Mingyi Zhang,<sup>\*a</sup> and Xinzhi Ma.<sup>\*a</sup>

Key Laboratory for Photonic and Electronic Bandgap Materials, Ministry of Education, School of Physics and Electronic Engineering, Harbin Normal University, Harbin 150025 (P. R. China).

E-mail: [xulingling\\_hit@163.com](mailto:xulingling_hit@163.com) (L. Xu)

[myzhangsci@hrbnu.edu.cn](mailto:myzhangsci@hrbnu.edu.cn) (M. Zhang);

[maxz@hrbnu.edu.cn](mailto:maxz@hrbnu.edu.cn) (X. Ma);

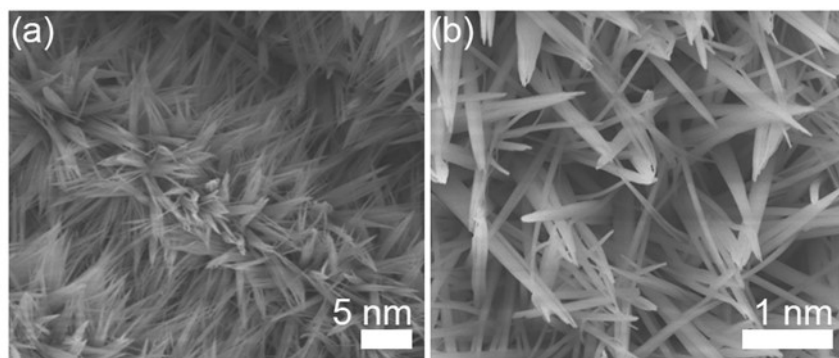

**Fig. S1** SEM of  $\text{Co(OH)F}_{\text{NWAs/CC}}$ .

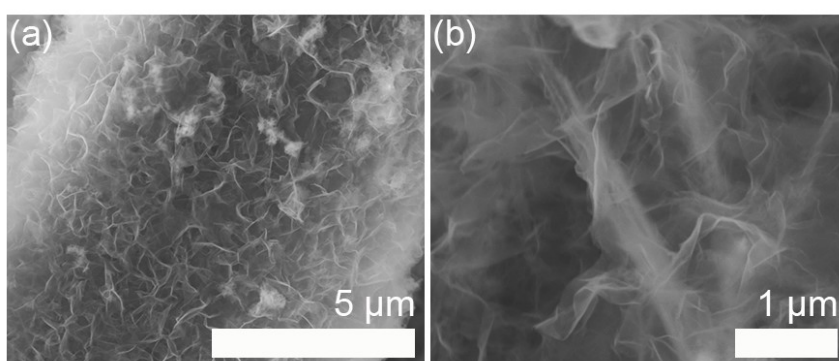

**Fig. S2** SEM of  $\text{B}_1\text{-CoN}_{\text{NWAs/CC}}$ .

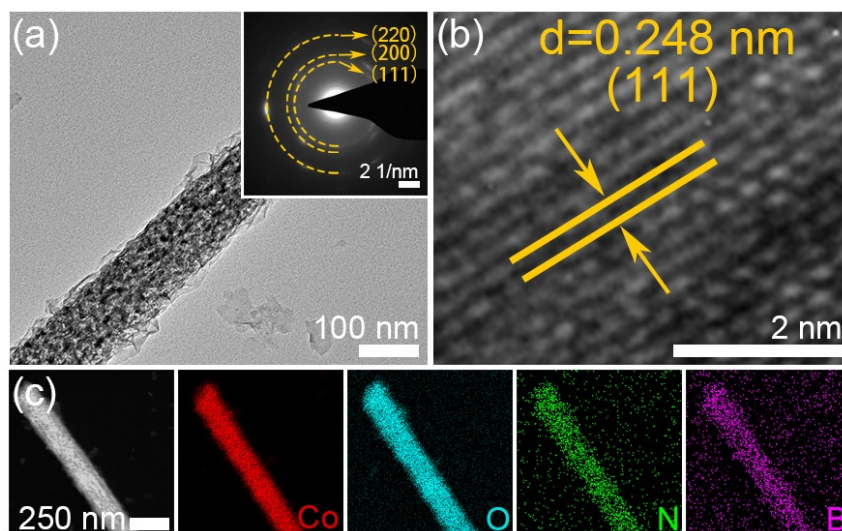

**Fig. S3** TEM, SAED, HRTEM, HAADF-STEM and mapping of  $\text{B}_1\text{-CoN}_{\text{NWAs/CC}}$ .

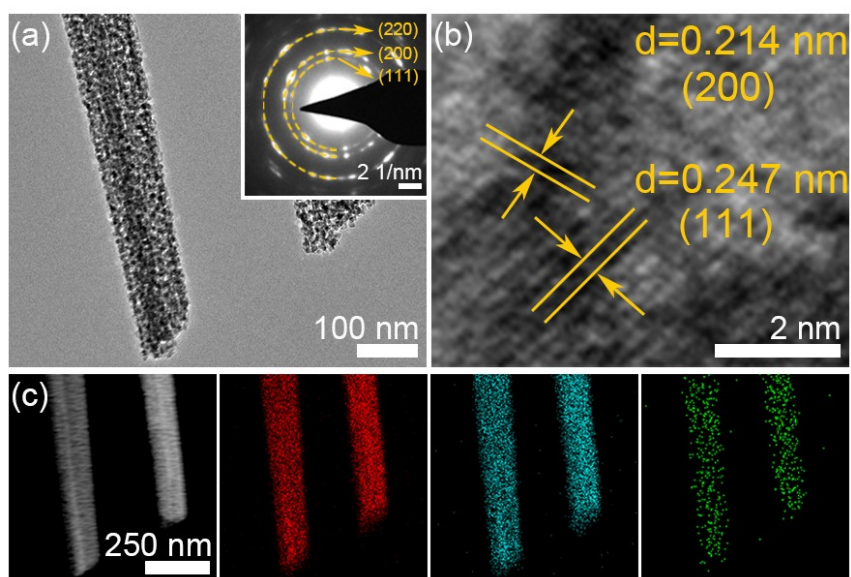

**Fig. S4** TEM, SAED, HRTEM, HAADF-STEM and mapping of CoN<sub>NWAs</sub>/CC.

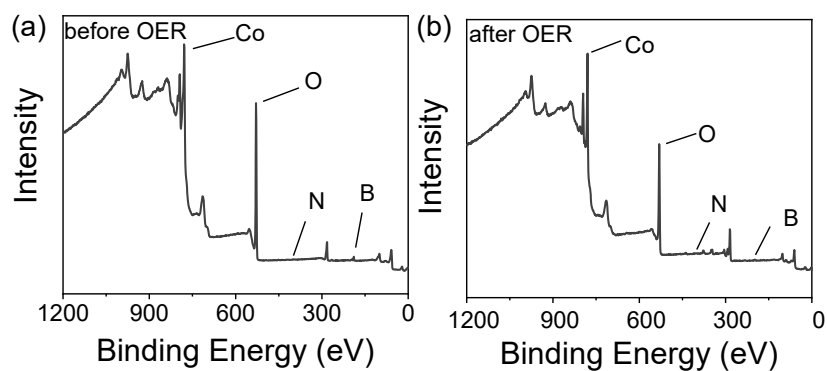

**Fig. S5** Survey XPS spectrums of B<sub>0.1</sub>-CoN<sub>NWAs</sub>/CC about before OER (a) and after OER (b).

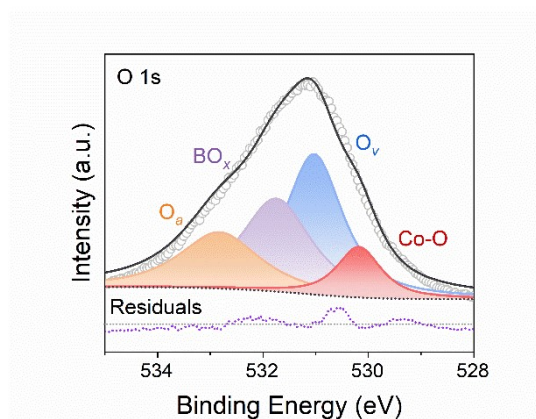

**Fig. S6** High-resolution O 1s spectra of B<sub>1</sub>-CoN<sub>NWAs</sub>/CC.

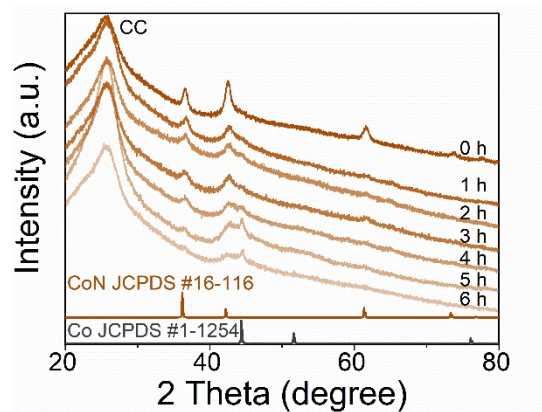

**Fig. S7** XRD spectra of CoN<sub>NWAs</sub>/CC soaked in 0.1 M NaBH<sub>4</sub> solution for one to six hours.

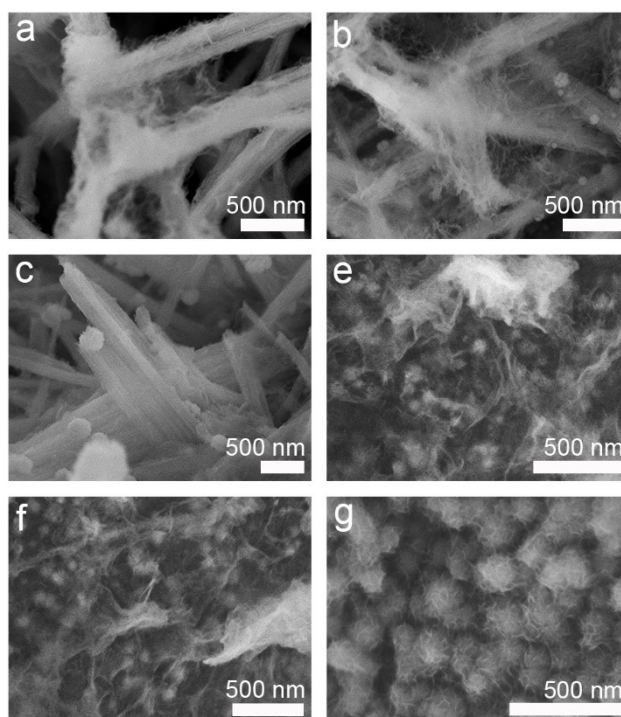

**Fig. S8** SEM images of CoN<sub>NWAs</sub>/CC soaked in 0.1 M NaBH<sub>4</sub> solution for (a-g) one to six hours.

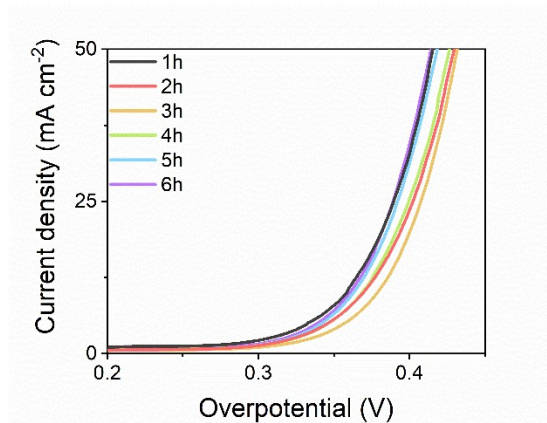

**Fig. S9** LSV curves of CoN<sub>NWAs</sub>/CC soaked in 0.1 M NaBH<sub>4</sub> solution for one to six hours.

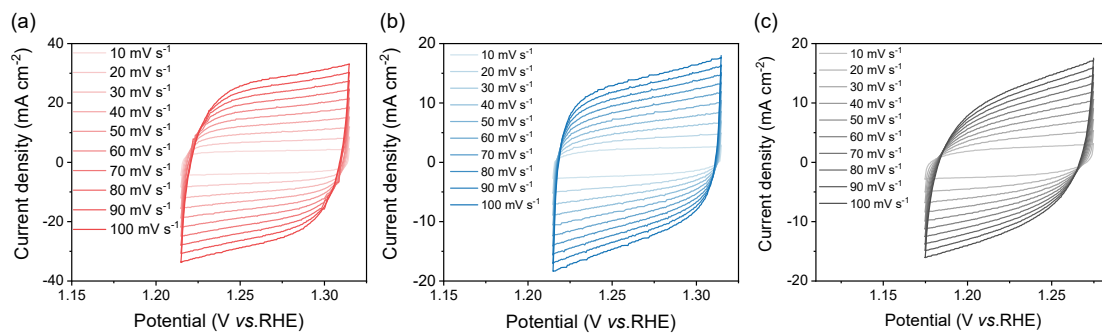

**Fig. S10**  $C_{dl}$  of (a) B<sub>0.1</sub>-CoN<sub>NWAs</sub>/CC, (b) B<sub>1</sub>-CoN<sub>NWAs</sub>/CC and (c) CoN<sub>NWAs</sub>/CC.

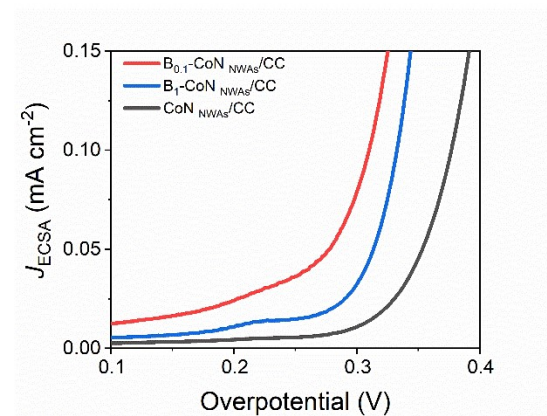

**Fig. S11** ECSA normalized LSV curves of these catalysts.



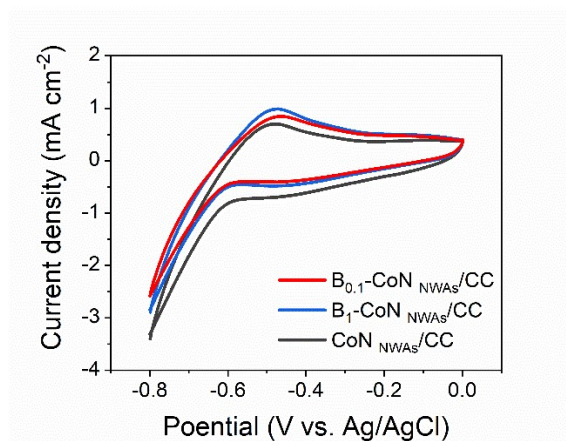

**Fig. S12** Cyclic voltammetry cycling in pH = 7 phosphate buffer with a scan rate of  $50 \text{ mV s}^{-1}$  range from -0.8 to 0 V vs. Ag/AgCl of  $\text{B}_{0.1}\text{-CoN}_{\text{NWAs}}/\text{CC}$ ,  $\text{B}_1\text{-CoN}_{\text{NWAs}}/\text{CC}$  and  $\text{CoN}_{\text{NWAs}}/\text{CC}$ .

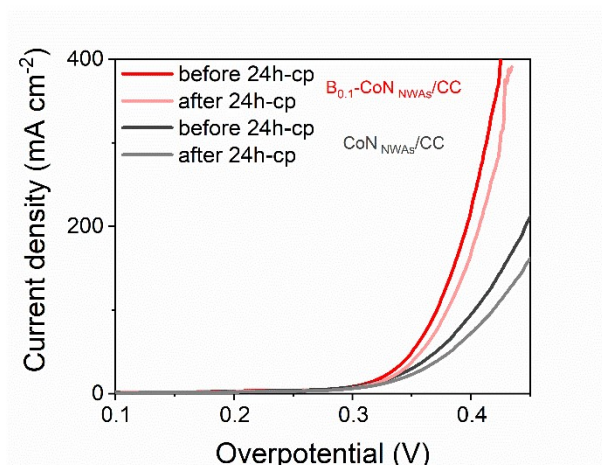

**Fig. S13** LSV curves of  $\text{B}_{0.1}\text{-CoN}_{\text{NWAs}}/\text{CC}$  and  $\text{CoN}_{\text{NWAs}}/\text{CC}$  before and after 24 h Chronopotentiometry measurements.

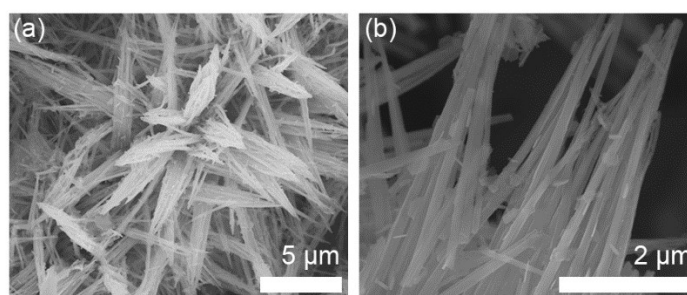

**Fig. S14** SEM image of  $\text{CoN}_{\text{NWAs}}/\text{CC}$  after OER.

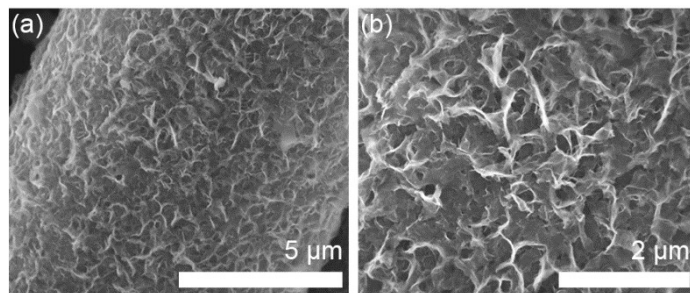

**Fig. S15** SEM image of B<sub>1</sub>-CoN<sub>NWAs</sub>/CC after OER.

**Table S1.** XPS results of B<sub>0.1</sub>-CoN<sub>NWAs</sub>/CC before OER.

|           |                  | BE (eV) | FWHM (eV) | % area | Table<br>S2. XPS<br>results<br>for the<br>O 1s of<br>B <sub>1</sub> -CoN<br>NWAs/CC<br>before<br>OER. |
|-----------|------------------|---------|-----------|--------|-------------------------------------------------------------------------------------------------------|
| Co 2p 3/2 | Co-N             | 779.80  | 1.1       | 5.2    |                                                                                                       |
|           | Co <sup>3+</sup> | 780.92  | 1.7       | 17.3   |                                                                                                       |
|           | Co <sup>2+</sup> | 782.20  | 3.3       | 27.8   |                                                                                                       |
|           | Sat.             | 786.40  | 5.0       | 17.8   |                                                                                                       |
| Co 2p 1/2 | Co <sup>3+</sup> | 796.28  | 1.9       | 0.1    |                                                                                                       |
|           | Co <sup>2+</sup> | 797.44  | 2.4       | 11.5   |                                                                                                       |
|           | Sat.             | 802.82  | 5.0       | 12.6   |                                                                                                       |
| N 1s      | B-N              | 397.45  | 1.9       | 17.3   |                                                                                                       |
|           | Pyridinic-N      | 398.45  | 1.2       | 10.9   |                                                                                                       |
|           | Co-N-B           | 399.45  | 1.2       | 17.3   |                                                                                                       |
|           | Pyrrolic-N       | 400.30  | 1.0       | 4.5    |                                                                                                       |
|           | N-O              | 403.16  | 3.0       | 50.0   |                                                                                                       |
| B 1s      | Co-N-B           | 189.50  | 1.2       | 12.0   |                                                                                                       |
|           | B-N              | 190.84  | 1.7       | 40.0   |                                                                                                       |
|           | B-O              | 191.52  | 1.3       | 48.0   |                                                                                                       |
| O 1s      | Co-O             | 530.62  | 1.0       | 19.3   |                                                                                                       |
|           | O <sub>v</sub>   | 531.28  | 1.3       | 40.1   |                                                                                                       |
|           | BO <sub>x</sub>  | 532.13  | 1.3       | 26.4   |                                                                                                       |
|           | O <sub>a</sub>   | 533.12  | 2.0       | 14.2   |                                                                                                       |



|      |                 | BE (eV) | FWHM (eV) | % area |
|------|-----------------|---------|-----------|--------|
| O 1s | Co-O            | 530.18  | 1.0       | 10.8   |
|      | O <sub>v</sub>  | 531.03  | 1.3       | 44.9   |
|      | BO <sub>x</sub> | 531.75  | 1.6       | 29.0   |
|      | O <sub>a</sub>  | 532.83  | 1.8       | 15.3   |

**Table S3.** Comparison of OER properties of other cobalt-based catalysts.

| Catalysts                                                | $\eta_{10}$ | Electrolyte                        | References |
|----------------------------------------------------------|-------------|------------------------------------|------------|
| NiO/CoN PINWs                                            | 300         | 0.1M KOH                           | S1         |
| Co@CNT/MSiC                                              | 396         | 0.1M KOH                           | S2         |
| NiCo <sub>2</sub> O <sub>4</sub> /CoN <sub>x</sub> -NMC  | 370         | 0.1M KOH                           | S3         |
| CoNS/C                                                   | 345         | 0.1M KOH                           | S4         |
| Co <sub>5.47</sub> N/Co <sub>3</sub> Fe <sub>7</sub> /NC | 379         | 1M KOH                             | S5         |
| g CoN <sub>x</sub> /NiFeO <sub>x</sub> /N-RGO            | 372         | 1M KOH                             | S6         |
| ZnCoHCF-3                                                | 350         | 1M KOH                             | S7         |
| Co-LDHs-4                                                | 241         | 1M KOH                             | S8         |
| CoN-Gr-2                                                 | 280         | 1M KOH                             | S9         |
| (N, S)-RGO@CoN                                           | 220         | 1M Na <sub>2</sub> SO <sub>4</sub> | S10        |
| Cu <sub>6</sub> Co <sub>7</sub> /CC                      | 500         | 0.2 M PBS                          | S11        |
| CoN/Co <sub>4</sub> N                                    | 398         | 1 M PBS                            | S12        |
| Co <sub>4</sub> N-CeO <sub>2</sub> /GP                   | 239         | 1M KOH                             | S13        |
| Co <sub>4</sub> N@CNNT                                   | 285         | 1M KOH                             | S14        |
| CoN@Ni foam                                              | 290         | 1M KOH                             | S15        |
| Co <sub>5.47</sub> N@N-rGO                               | 350         | 1M KOH                             | S16        |
| Co <sub>3</sub> N@AN-C                                   | 280         | 1M KOH                             | S17        |
| Ni-Co <sub>4</sub> N                                     | 233         | 1M KOH                             | S18        |
| CoO/CoSe <sub>2</sub>                                    | 396         | 0.5 M PBS                          | S19        |

**Table S4.** XPS results for the Co 2p, N 1s, B 1s and O 1s of B<sub>0.1</sub>-CoN<sub>NWAs</sub>/CC after OER.

|                      |                  | BE (eV) | FWHM (eV) | % area |
|----------------------|------------------|---------|-----------|--------|
| Co 2p <sub>3/2</sub> | Co <sup>3+</sup> | 779.90  | 1.9       | 44.8   |
|                      | Co <sup>2+</sup> | 781.30  | 1.8       | 13.8   |
|                      | Sat.             | 789.50  | 6.0       | 6.9    |
| Co 2p <sub>1/2</sub> | Co <sup>3+</sup> | 794.72  | 1.2       | 8.6    |
|                      | Co <sup>2+</sup> | 795.90  | 3.1       | 19.0   |
|                      | Sat.             | 805.42  | 5.0       | 6.9    |
| N 1s                 | N-B              | 397.45  | 1.2       | 0.1    |
|                      | Pyridinic-N      | 398.90  | 0.9       | 11.3   |
|                      | N-Co             | 399.63  | 1.3       | 31.0   |
|                      | Pyrrolic-N       | 400.66  | 1.5       | 8.5    |
|                      | N-O              | 403.60  | 2.8       | 35.2   |
| B 1s                 | B-N              | 191.10  | 0.5       | 21.7   |
|                      | B-O              | 191.58  | 0.9       | 78.3   |
| O 1s                 | Co-O             | 529.52  | 1.5       | 35.4   |
|                      | O <sub>v</sub>   | 530.85  | 1.4       | 38.3   |
|                      | BO <sub>x</sub>  | 531.75  | 1.5       | 20.7   |
|                      | O <sub>a</sub>   | 533.00  | 2.0       | 5.6    |

## References

- S1 J. Yin, Y. Li, F. Lv, Q. Fan, Y.-Q. Zhao, Q. Zhang, W. Wang, F. Cheng, P. Xi, and S. Guo, *ACS Nano*, 2017, **11**, 2275-2283.
- S2 C. Xiao, J. Luo, M. Tan, Y. Xiao, B. Gao, Y. Zheng, and B. Lin, *J. Power Sources*, 2020, **453**, 227900
- S3 M.-F. Qiao, Y. Wang, L. Li, G.-Z. Hu, G.-A. Zou, X. Mamat, Y.-M. Dong, and Xun Hu, *Rare Metals*, 2020, **39**, 824-833.
- S4 Y. Wang, S. Zhang, X. Meng, T. Wang, Y. Feng, W. Zhang, Y.-S. He, Y. Huang, N. Yang, and Z.-F. Ma, *ACS Appl. Mater. Interfaces*, 2021, **13**, 503-513.
- S5 L. Li, J. Chen, S. Wang, Y. Huang, and D. Cao, *Appl. Surf. Sci.*, 2022, **582**, 152375.
- S6 X. Jia, Y. Zhang, D. Guo, L. Zhang, L. Wang, and L. Zhou, *Ionics*, 2020, **26**, 1885-1894.
- S7 P. Jain, S. Jha, and P. P. Ingole, *ACS Appl. Energy Mater.*, 2023, **6**, 3278-3290.
- S8 Q. Chen, R. Ding, H. Liu, L. Zhou, Y. Wang, Y. Zhang, and G. Fan, *ACS Appl. Mater. Interfaces*, 2020, **12**, 12919-12929.
- S9 T. Liu, S. Cai, G. Zhao, Z. Gao, S. Liu, H. Li, L. Chen, M. Li, X. Yang, and H. Guo, *J. Energy Chem.*, 2021, **62**, 440-450.
- S10 D. Guo, Z. Zeng, Z. Wan, Y. Li, B. Xi, and C. Wang, *Adv. Funct. Mater.*, 2021,

**31**, 2101324.

S11 M. Wang, W. Zhong, S. Zhang, R. Liu, J. Xing, and G. Zhang, *J. Mater. Chem. A*, 2018, **6**, 9915-9921.

S12 R.-Q. Li, P. Hu, M. Miao, Y. Li, X.-F. Jiang, Q. Wu, Z. Meng, Z. Hu, Y. Bando, and X.-B. Wang, *J. Mater. Chem. A*, 2018, **6**, 24767-24772.

S13 H. Sun, C. Tian, G. Fan, J. Qi, Z. Liu, Z. Yan, and F. Cheng, J. Chen, C.-P. Li, and M. Du, *Adv. Funct. Mater.*, 2020, **30**, 1910596.

S14 N. Wang, B. Hao, H. Chen, R. Zheng, B. Chen, S. Kuang, X. Chen, and L. Cui, *Chem. Eng. J.*, 2021, **413**, 127954.

S15 Y. Zhang, B. Ouyang, J. Xu, G. Jia, S. Chen, R. S. Rawat, and H. Fan, *Angew. Chem. Int. Ed.*, 2016, **55**, 8670-8674.

S16 X. Shu, S. Chen, S. Chen, W. Pan, and Ji Zhang, *Carbon*, 2020, **157**, 234-243.

S17 B. K. Kang, S. Y. Im, J. Lee, S. H. Kwag, S. B. Kwon, S. Tiruneh, M.-J. Kim, J. H. Kim, W. S. Yang, B. Lim, and D. H. Yoon, *Nano Res.*, 2019, **12**, 1605-1611.

S18 D. Li, W. Zhang, J. Zeng, B. Gao, Y. Tang, and Q. Gao, *Sci. China Mater.*, 2021, **64**, 1889-1899.

S19 K. Li, J. Zhang, R. Wu, Y. Yu, and B. Zhang, *Adv. Sci.*, 2016, **3**, 1500426.
